# Supplementary material for: Cross-Sectional Association between Perceived Physical Literacy and Mediterranean Dietary Patterns in Adolescents: The EHDLA Study
Source: MDPI journal article supplement (doi:10.3390/nu15204400), 2023-10-17
Supplement: s1 [file s1]

**Table S1.** Mediterranean Diet Quality Index in children and adolescents according to perceived physical literacy status.

| KIDMED items                                       | Low PPL<br>(9–31 Points) | Medium PPL<br>(32–36 Points) | High PPL<br>(31–45 Points) | <i>p</i> |
|----------------------------------------------------|--------------------------|------------------------------|----------------------------|----------|
| Fruit or fruit juice daily                         | 196 (67.1)               | 231 (76.0)                   | 200 (80.3)                 | 0.001    |
| Second serving of fruit daily                      | 88 (30.1)                | 127 (41.8)                   | 119 (47.8)                 | <0.001   |
| Fresh or cooked vegetables daily                   | 188 (64.4)               | 218 (71.7)                   | 195 (78.3)                 | 0.002    |
| Fresh or cooked vegetables >1/day                  | 78 (26.7)                | 115 (37.8)                   | 91 (36.5)                  | 0.008    |
| Regular fish consumption (at least 2-3/week)       | 149(51)                  | 183(60.2)                    | 174(69.9)                  | <0.001   |
| >1/week fast-food (hamburger) restaurant           | 97(33.2)                 | 95(31.2)                     | 65(26.1)                   | 0.185    |
| Pulses >1/week                                     | 209(71.6)                | 244(80.3)                    | 198(79.5)                  | 0.023    |
| Pasta or rice almost daily (≥5 days/week)          | 174 (59.6)               | 162 (53.3)                   | 144 (57.8)                 | 0.278    |
| Cereal or cereal product for breakfast             | 155 (53.1)               | 188 (61.8)                   | 156 (62.7)                 | 0.037    |
| Regular nut consumption (at least 2-3/week)        | 156(53.4)                | 176(57.9)                    | 162(65.1)                  | 0.023    |
| Use of olive oil at home                           | 275(94.2)                | 302(99.3)                    | 245(98.4)                  | <0.001   |
| No breakfast                                       | 56(19.2)                 | 44(14.5)                     | 27(10.8)                   | 0.024    |
| Dairy product for breakfast                        | 206(70.5)                | 237(78.0)                    | 202(81.1)                  | 0.011    |
| Commercially baked goods or pastries for breakfast | 58(19.9)                 | 46(15.1)                     | 29(11.6)                   | 0.031    |
| Two yoghurts and/or 40g cheese daily               | 96(32.9)                 | 121(39.8)                    | 103(41.4)                  | 0.088    |
| Sweets and candy several times a day               | 76 (26.0)                | 64 (21.1)                    | 51 (20.5)                  | 0.221    |

KIDMED, Mediterranean Diet Quality Index in children and adolescents; PPL, perceived physical literacy.
